# Supplementary material for: Stereoselective quantitative analysis of ranolazine in plasma and tissue samples: application in pharmacokinetics and tissue distribution studies
Source: Royal Society of Chemistry journal article supplement (doi:10.1039/d2nj02302d), 2022-01-01
Supplement: d2nj02302d1.pdf [file d2nj02302d1.pdf]

## **Stereoselective quantitative analysis of ranolazine in plasma and tissue samples: Application in pharmacokinetics and tissue distribution studies**

**Yuanyuan Zhu <sup>a</sup>, Hong Zhang <sup>b\*</sup>, Siman Ma <sup>a</sup>, Lizhi Miao <sup>c</sup>, Ge Jin <sup>d</sup>, Jiahui Li <sup>e</sup>, Tohutanguli.Nuerkaman <sup>e</sup>, Qiruo Sun <sup>a</sup>, Yang Liu <sup>d</sup>, Shiliang Yin <sup>d\*</sup>**

<sup>a</sup> School of Pharmacy, Shenyang Pharmaceutical University, Shenyang 110016, China

<sup>b</sup> School of Life science and Biopharmaceutics, Shenyang Pharmaceutical University, Shenyang 110016, China

<sup>c</sup> Safety Evaluation Center of Shenyang SYRICI Testing Co.,Ltd., Shenyang 110141, China

<sup>d</sup> School of Pharmacy, Shenyang Medical College, Shenyang, 110034, China

<sup>e</sup> School of Business Administration, Shenyang Pharmaceutical University, Shenyang 110016, China

Corresponding to:

Shiliang Yin

School of Pharmacy, Shenyang Medical College, No.146 Huanghe North Street, Shenyang, Liaoning 110034, China

E-mail address: [ysslal@163.com](mailto:ysslal@163.com) (S.L.Yin)

Hong Zhang

School of Life science and Biopharmaceutics, No.103 Wenhua Road, Shenyang, Liaoning 110016, China

E-mail address: [song0688@sina.com](mailto:song0688@sina.com) (H. Zhang)

**Figure S1** Effect of the sorbent for SPE (A), extract solvent for LLE (B) and volume of MTBE for LLE (C) on the recoveries of analytes

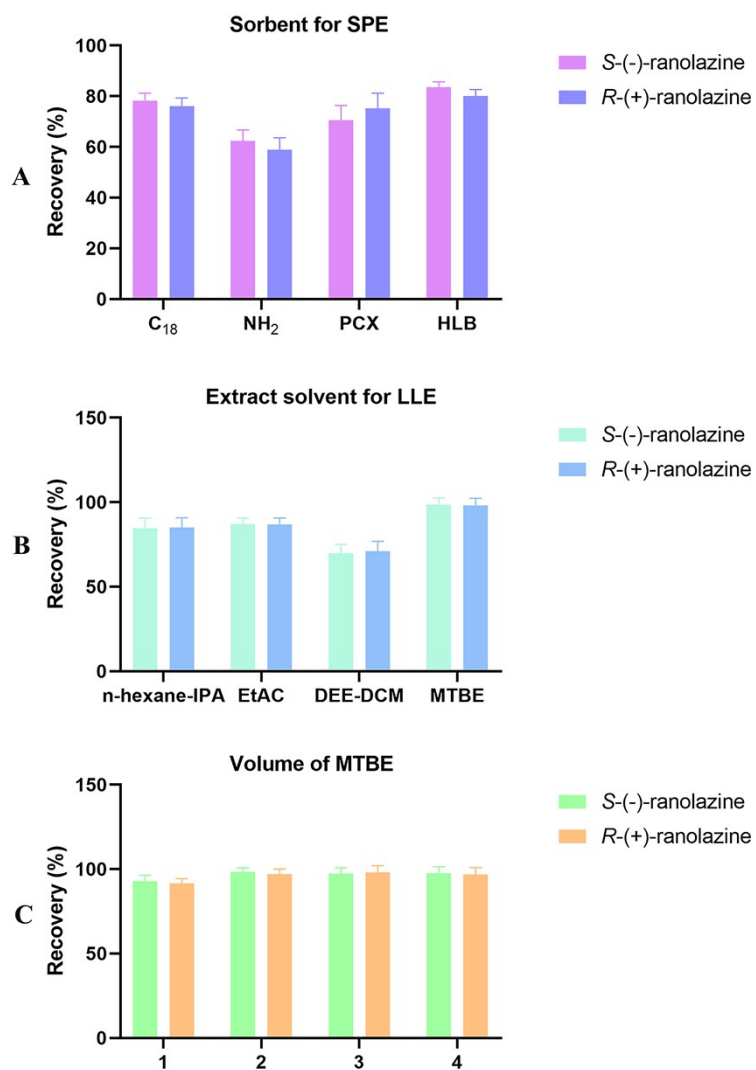

**Figure S2** Product ion mass spectra of (A) ranolazine and (B) ornidazole (IS)

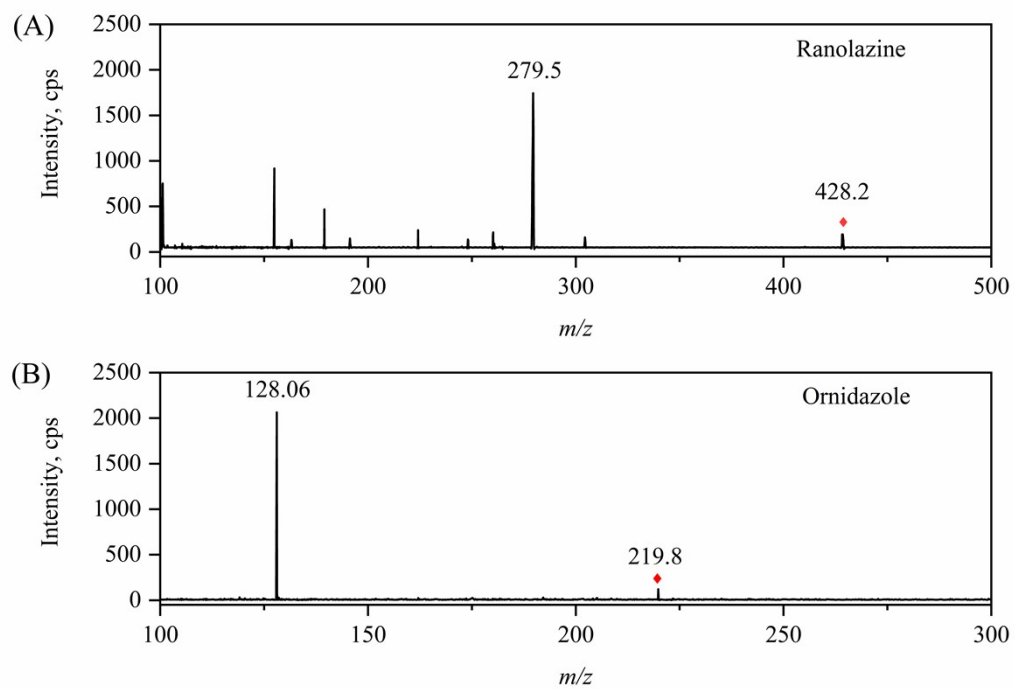

**Table S1** Intra- and inter-day accuracy and precision of *R*-(+)- and *S*-(-)-ranolazine in plasma and tissue samples at LLOQ<sup>a</sup> and three QC<sup>b</sup> levels

| Analytes | Nominal concentration (ng/mL) | Intra-day (n=6)                  |                     |                      | Inter-day (n=18)                 |             |         |      |
|----------|-------------------------------|----------------------------------|---------------------|----------------------|----------------------------------|-------------|---------|------|
|          |                               | Calculated concentration (ng/mL) | RE <sup>c</sup> (%) | RSD <sup>d</sup> (%) | Calculated concentration (ng/mL) | RE (%)      | RSD (%) |      |
| Plasma   | <i>R</i> -(+)-ranolazine      | 2.0                              | 2.1 ± 0.1           | 5.0                  | 4.8                              | 1.9 ± 0.1   | -5.0    | 5.3  |
|          |                               | 6.0                              | 6.3 ± 0.4           | 5.0                  | 6.3                              | 6.1 ± 0.2   | 1.7     | 3.3  |
|          |                               | 40.0                             | 41.1 ± 2.2          | 2.8                  | 5.4                              | 42.0 ± 1.9  | 5.0     | 4.5  |
|          |                               | 80.0                             | 78.4 ± 3.7          | -2.0                 | 4.7                              | 81.4 ± 3.0  | 1.8     | 3.7  |
|          | <i>S</i> -(-)-ranolazine      | 2.0                              | 2.1 ± 0.1           | 5.0                  | 4.8                              | 1.8 ± 0.1   | -10.0   | 5.6  |
|          |                               | 6.0                              | 6.2 ± 0.3           | 3.3                  | 4.8                              | 6.1 ± 0.3   | 1.7     | 4.9  |
|          |                               | 40.0                             | 41.9 ± 2.5          | 4.8                  | 6.0                              | 41.7 ± 1.7  | 4.3     | 4.1  |
|          |                               | 80.0                             | 78.0 ± 3.6          | -2.5                 | 4.6                              | 81.8 ± 3.1  | 2.3     | 3.8  |
| Heart    | <i>R</i> -(+)-ranolazine      | 2.0                              | 2.1 ± 0.2           | 5.0                  | 9.5                              | 1.9 ± 0.1   | -5.0    | 5.3  |
|          |                               | 6.0                              | 6.4 ± 0.4           | 6.7                  | 6.3                              | 5.9 ± 0.2   | -1.7    | 3.4  |
|          |                               | 80.0                             | 78.4 ± 2.5          | -2.0                 | 3.2                              | 82.4 ± 2.9  | 3.0     | 3.5  |
|          |                               | 160.0                            | 165.5 ± 4.0         | 3.4                  | 2.4                              | 165.0 ± 5.8 | 3.1     | 3.5  |
|          | <i>S</i> -(-)-ranolazine      | 2.0                              | 2.1 ± 0.2           | 5.0                  | 9.5                              | 1.9 ± 0.1   | -5.0    | 5.3  |
|          |                               | 6.0                              | 6.3 ± 0.3           | 5.0                  | 4.8                              | 5.8 ± 0.3   | -3.3    | 5.2  |
|          |                               | 80.0                             | 78.9 ± 2.3          | -1.4                 | 2.9                              | 81.9 ± 3.2  | 2.4     | 3.9  |
|          |                               | 160.0                            | 166.0 ± 3.4         | 3.8                  | 2.0                              | 163.9 ± 5.1 | 2.4     | 3.1  |
| Liver    | <i>R</i> -(+)-ranolazine      | 2.0                              | 2.1 ± 0.2           | 5.0                  | 9.5                              | 1.9 ± 0.2   | -5.0    | 10.5 |
|          |                               | 6.0                              | 6.4 ± 0.5           | 6.7                  | 7.8                              | 6.2 ± 0.4   | 3.3     | 6.5  |
|          |                               | 200.0                            | 193.0 ± 3.2         | -3.5                 | 1.7                              | 204.3 ± 5.0 | 2.2     | 2.4  |
|          |                               | 400.0                            | 408.7 ± 7.3         | 2.2                  | 1.8                              | 397.3 ± 3.8 | -0.68   | 1.0  |
|          | <i>S</i> -(-)-ranolazine      | 2.0                              | 2.1 ± 0.2           | 5.0                  | 9.5                              | 1.8 ± 0.2   | -10.0   | 11.1 |
|          |                               | 6.0                              | 6.5 ± 0.6           | 8.3                  | 9.2                              | 6.3 ± 0.3   | 5.0     | 4.8  |
|          |                               | 200.0                            | 195.0 ± 5.8         | -2.5                 | 3.0                              | 205.7 ± 6.1 | 2.9     | 3.0  |
|          |                               | 400.0                            | 405.9 ± 6.1         | 1.5                  | 1.5                              | 395.2 ± 3.1 | -1.2    | 0.8  |
| Spleen   | <i>R</i> -(+)-ranolazine      | 2.0                              | 1.9 ± 0.1           | -5.0                 | 5.3                              | 2.1 ± 0.2   | 5.0     | 9.5  |
|          |                               | 6.0                              | 5.7 ± 0.4           | -5.0                 | 7.0                              | 6.2 ± 0.4   | 3.3     | 6.5  |
|          |                               | 80.0                             | 78.2 ± 1.4          | -2.3                 | 1.8                              | 81.2 ± 2.6  | 1.5     | 3.2  |
|          |                               | 160.0                            | 164.3 ± 3.2         | 2.7                  | 1.9                              | 166.3 ± 4.8 | 3.9     | 2.9  |
|          | <i>S</i> -(-)-ranolazine      | 2.0                              | 1.9 ± 0.1           | -5.0                 | 5.3                              | 2.2 ± 0.3   | 10.0    | 13.6 |
|          |                               | 6.0                              | 5.8 ± 0.3           | -3.3                 | 5.2                              | 6.3 ± 0.3   | 5.0     | 4.8  |
|          |                               | 80.0                             | 78.8 ± 1.6          | -1.5                 | 2.0                              | 82.0 ± 3.1  | 2.5     | 3.8  |
|          |                               | 160.0                            | 165.0 ± 3.0         | 3.1                  | 1.8                              | 167.4 ± 5.0 | 4.6     | 3.0  |
| Lung     | <i>R</i> -(+)-ranolazine      | 2.0                              | 2.1 ± 0.1           | 5.0                  | 4.8                              | 1.9 ± 0.2   | -5.0    | 10.5 |
|          |                               | 6.0                              | 5.7 ± 0.2           | -5.0                 | 3.5                              | 6.2 ± 0.4   | 3.3     | 6.5  |
|          |                               | 80.0                             | 76.1 ± 1.8          | -4.9                 | 2.4                              | 84.6 ± 2.4  | 5.8     | 2.8  |
|          |                               | 160.0                            | 165.4 ± 4.1         | 3.4                  | 2.5                              | 155.0 ± 5.1 | -3.1    | 3.3  |
|          | <i>S</i> -(-)-ranolazine      | 2.0                              | 2.1 ± 0.1           | 5.0                  | 4.8                              | 1.9 ± 0.2   | -5.0    | 10.5 |

|        |                |       |             |      |     |             |      |     |
|--------|----------------|-------|-------------|------|-----|-------------|------|-----|
|        |                | 6.0   | 5.8 ± 0.3   | -3.3 | 5.2 | 6.3 ± 0.5   | 5.0  | 7.9 |
|        |                | 80.0  | 77.0 ± 2.0  | -3.8 | 2.6 | 83.8 ± 3.0  | 4.8  | 3.6 |
|        |                | 160.0 | 166.9 ± 6.2 | 4.3  | 3.7 | 158.3 ± 4.2 | -1.1 | 2.7 |
|        |                | 2.0   | 2.2 ± 0.2   | 10.0 | 9.1 | 1.9 ± 0.1   | -5.0 | 5.3 |
|        | <i>R</i> -(+)- | 6.0   | 6.3 ± 0.4   | 5.0  | 6.3 | 6.2 ± 0.3   | 3.3  | 4.8 |
|        | ranolazine     | 100.0 | 97.7 ± 1.6  | -2.3 | 1.6 | 102.1 ± 1.7 | 2.1  | 1.7 |
| Kidney |                | 200.0 | 204.9 ± 3.2 | 2.5  | 1.6 | 191.5 ± 4.8 | -4.3 | 2.5 |
|        |                | 2.0   | 2.1 ± 0.2   | 5.0  | 9.5 | 1.9 ± 0.1   | -5.0 | 5.3 |
|        | <i>S</i> -(-)- | 6.0   | 6.2 ± 0.3   | 3.3  | 4.8 | 6.4 ± 0.4   | 6.7  | 6.3 |
|        | ranolazine     | 100.0 | 98.0 ± 2.1  | -2.0 | 2.1 | 105.4 ± 2.1 | 5.4  | 2.0 |
|        |                | 200.0 | 202.7 ± 2.5 | 1.4  | 1.2 | 193.0 ± 5.2 | -3.5 | 2.7 |

<sup>a</sup> LLOQ, lower limit of quantitative; <sup>b</sup> QC, quality control; <sup>c</sup> RE, relative error; <sup>d</sup> RSD, relative standard deviation

**Table S2** Extraction recoveries and matrix effect of *R*-(+)- and *S*-(-)-ranolazine in

plasma and tissue samples

|        | Analytes                    | Nominal concentration (ng/mL) | Recovery       |         | NMF            |         |
|--------|-----------------------------|-------------------------------|----------------|---------|----------------|---------|
|        |                             |                               | (mean ± SD, %) | RSD (%) | (mean ± SD, %) | RSD (%) |
| Plasma | <i>R</i> -(+)-<br>ranolazin | 6.0                           | 102.4 ± 3.9    | 3.8     | 103.8 ± 9.3    | 9.0     |
|        |                             | 40.0                          | 98.3 ± 3.1     | 3.2     | 101.5 ± 6.4    | 6.3     |
|        |                             | 80.0                          | 97.6 ± 4.6     | 4.7     | 99.5 ± 6.3     | 6.3     |
|        | <i>S</i> -(-)-<br>ranolazin | 6.0                           | 101.9 ± 4.0    | 3.9     | 104.3 ± 10.5   | 10.1    |
|        |                             | 40.0                          | 98.1 ± 2.9     | 3.0     | 100.9 ± 7.1    | 7.0     |
|        |                             | 80.0                          | 97.2 ± 4.9     | 5.0     | 99.1 ± 5.0     | 5.0     |
| Heart  | <i>R</i> -(+)-<br>ranolazin | 6.0                           | 97.0 ± 4.5     | 4.6     | 98.3 ± 4.9     | 5.0     |
|        |                             | 80.0                          | 101.2 ± 5.9    | 5.8     | 97.0 ± 6.3     | 6.5     |
|        |                             | 160.0                         | 98.6 ± 6.1     | 6.2     | 102.8 ± 7.9    | 7.7     |
|        | <i>S</i> -(-)-<br>ranolazin | 6.0                           | 97.6 ± 3.1     | 3.2     | 97.5 ± 4.4     | 4.5     |
|        |                             | 80.0                          | 100.9 ± 5.3    | 5.3     | 96.6 ± 6.0     | 6.2     |
|        |                             | 160.0                         | 98.5 ± 6.5     | 6.6     | 103.0 ± 7.7    | 7.5     |
| Liver  | <i>R</i> -(+)-<br>ranolazin | 6.0                           | 101.6 ± 8.8    | 8.7     | 101.4 ± 10.9   | 10.7    |
|        |                             | 200.0                         | 96.4 ± 3.8     | 3.9     | 101.7 ± 8.5    | 8.4     |
|        |                             | 400.0                         | 98.4 ± 2.9     | 2.9     | 97.8 ± 6.3     | 6.4     |
|        | <i>S</i> -(-)-<br>ranolazin | 6.0                           | 102.0 ± 8.0    | 7.8     | 100.8 ± 9.8    | 9.7     |
|        |                             | 200.0                         | 97.0 ± 3.5     | 3.6     | 102.0 ± 8.0    | 7.8     |
|        |                             | 400.0                         | 98.8 ± 3.0     | 3.0     | 98.1 ± 6.0     | 6.1     |
| Spleen | <i>R</i> -(+)-<br>ranolazin | 6.0                           | 101.4 ± 5.3    | 5.2     | 101.9 ± 10.4   | 10.2    |
|        |                             | 80.0                          | 97.3 ± 9.1     | 9.4     | 98.5 ± 8.4     | 8.5     |
|        |                             | 160.0                         | 98.4 ± 5.2     | 5.3     | 102.0 ± 7.6    | 7.5     |
|        | <i>S</i> -(-)-<br>ranolazin | 6.0                           | 100.8 ± 5.0    | 5.0     | 100.7 ± 10.1   | 10.0    |
|        |                             | 80.0                          | 97.7 ± 9.0     | 9.2     | 97.6 ± 7.7     | 7.9     |
|        |                             | 160.0                         | 98.0 ± 4.8     | 4.9     | 101.6 ± 7.0    | 6.9     |
| Lung   | <i>R</i> -(+)-<br>ranolazin | 6.0                           | 104.3 ± 9.2    | 8.8     | 96.3 ± 5.6     | 5.8     |
|        |                             | 80.0                          | 97.7 ± 8.8     | 9.0     | 101.2 ± 6.5    | 6.4     |
|        |                             | 160.0                         | 97.4 ± 3.9     | 4.0     | 103.5 ± 8.0    | 7.7     |
|        | <i>S</i> -(-)-<br>ranolazin | 6.0                           | 103.7 ± 9.1    | 8.8     | 97.5 ± 6.1     | 6.3     |
|        |                             | 80.0                          | 97.5 ± 8.9     | 9.1     | 102.3 ± 7.0    | 6.8     |

|        |                |       |             |      |             |     |
|--------|----------------|-------|-------------|------|-------------|-----|
|        |                | 160.0 | 98.0 ± 4.0  | 4.1  | 103.3 ± 8.1 | 7.8 |
|        |                | 6.0   | 100.5 ± 6.5 | 6.5  | 102.0 ± 5.8 | 5.7 |
|        | <i>R</i> -(+)- | 100.0 | 95.3 ± 9.0  | 9.4  | 98.4 ± 6.9  | 7.0 |
|        | ranolazine     | 200.0 | 97.5 ± 4.2  | 4.3  | 100.3 ± 3.9 | 3.9 |
| Kidney | e              |       |             |      |             |     |
|        |                | 6.0   | 100.4 ± 6.3 | 6.3  | 102.2 ± 5.5 | 5.4 |
|        | <i>S</i> -(-)- | 100.0 | 95.5 ± 9.6  | 10.1 | 98.8 ± 7.0  | 7.1 |
|        | ranolazine     | 200.0 | 98.3 ± 3.8  | 3.9  | 100.1 ± 4.5 | 4.5 |
|        | e              |       |             |      |             |     |

NMF: normalized matrix factor

**Table S3.** Stability results of *R*-(+)- and *S*-(-)-ranolazine in plasma and tissues under various storage conditions (n = 6)

| Analytes | Nominal concentration (ng/mL) | Room temperature for 12 h |         | On the autosampler tray 4°C for 24 h |         | -80°C for 30 days |         | Three freeze-thaw cycles |         |     |
|----------|-------------------------------|---------------------------|---------|--------------------------------------|---------|-------------------|---------|--------------------------|---------|-----|
|          |                               | RE (%)                    | RSD (%) | RE (%)                               | RSD (%) | RE (%)            | RSD (%) | RE (%)                   | RSD (%) |     |
| Plasma   | <i>R</i> -(+)-ranolazine      | 6.0                       | 8.3     | 10.4                                 | -11.2   | 10.4              | -6.2    | 8.3                      | 12.4    | 9.7 |
|          |                               | 40.0                      | -5.5    | 6.2                                  | -5.3    | 5.1               | 4.2     | 5.9                      | 9.3     | 4.2 |
|          |                               | 80.0                      | 3.6     | 4.3                                  | 3.8     | 5.8               | 1.9     | 5.1                      | -4.2    | 4.0 |
|          | <i>S</i> -(-)-ranolazine      | 6.0                       | 8.0     | 11.1                                 | -10.8   | 9.3               | -5.9    | 9.2                      | 13.0    | 9.8 |
|          |                               | 40.0                      | -5.7    | 6.0                                  | -5.0    | 5.5               | 4.9     | 6.3                      | 8.0     | 3.6 |
|          |                               | 80.0                      | 2.9     | 5.0                                  | 4.1     | 6.0               | 2.2     | 5.0                      | -3.6    | 3.5 |
| Heart    | <i>R</i> -(+)-ranolazine      | 6.0                       | -10.6   | 8.2                                  | 11.4    | 8.5               | -5.2    | 7.8                      | -10.4   | 9.4 |
|          |                               | 80.0                      | 8.2     | 4.3                                  | -7.4    | 7.4               | 7.3     | 3.8                      | 6.9     | 5.3 |
|          |                               | 160.0                     | 5.1     | 1.2                                  | 2.6     | 4.9               | 3.2     | 4.4                      | 4.8     | 4.9 |
|          | <i>S</i> -(-)-ranolazine      | 6.0                       | -10.1   | 8.8                                  | 12.1    | 9.0               | -4.8    | 6.9                      | -11.8   | 9.1 |
|          |                               | 80.0                      | 8.0     | 4.7                                  | -7.9    | 7.0               | 7.0     | 4.0                      | 7.4     | 5.6 |
|          |                               | 160.0                     | 5.5     | 1.0                                  | 2.5     | 5.5               | 3.0     | 4.9                      | 4.7     | 5.2 |
| Liver    | <i>R</i> -(+)-ranolazine      | 6.0                       | -10.8   | 5.8                                  | 6.9     | 7.3               | 8.9     | 8.3                      | -9.3    | 8.4 |
|          |                               | 200.0                     | 6.4     | 4.9                                  | 6.8     | 5.4               | -8.5    | 7.1                      | 6.4     | 7.3 |
|          |                               | 400.0                     | 5.2     | 2.8                                  | -3.8    | 4.7               | 5.3     | 1.9                      | 1.6     | 0.9 |
|          | <i>S</i> -(-)-ranolazine      | 6.0                       | -10.5   | 5.5                                  | 7.4     | 6.9               | 9.6     | 9.5                      | -10.8   | 8.5 |
|          |                               | 200.0                     | 6.0     | 5.6                                  | 6.0     | 5.0               | -7.1    | 6.3                      | 6.1     | 7.0 |
|          |                               | 400.0                     | 5.1     | 3.0                                  | -3.3    | 4.1               | 5.1     | 2.2                      | 1.5     | 1.2 |
| Spleen   | <i>R</i> -(+)-ranolazine      | 6.0                       | -11.8   | 10.5                                 | -8.2    | 6.9               | -8.4    | 10.5                     | 7.7     | 6.4 |
|          |                               | 80.0                      | 7.6     | 9.3                                  | 6.1     | 5.2               | 6.9     | 4.9                      | 6.6     | 4.8 |
|          |                               | 160.0                     | 5.4     | 4.9                                  | 4.8     | 3.0               | 0.9     | 4.3                      | -9.8    | 6.3 |
|          | <i>S</i> -(-)-ranolazine      | 6.0                       | -12.1   | 10.3                                 | -7.5    | 6.5               | -8.9    | 11.9                     | 8.1     | 6.7 |
|          |                               | 80.0                      | 8.2     | 8.8                                  | 6.0     | 5.7               | 7.2     | 5.1                      | 6.3     | 4.5 |
|          |                               | 160.0                     | 5.0     | 4.6                                  | 4.3     | 4.1               | 0.6     | 4.0                      | -9.3    | 8.0 |
| Lung     | <i>R</i> -(+)-ranolazine      | 6.0                       | -12.3   | 8.7                                  | 8.3     | 6.9               | -9.2    | 5.4                      | -9.3    | 6.4 |
|          |                               | 80.0                      | 7.4     | 3.9                                  | 5.9     | 5.8               | 6.4     | 3.8                      | -10.2   | 4.9 |
|          |                               | 160.0                     | 6.2     | 5.3                                  | -1.8    | 0.9               | 5.7     | 1.9                      | 5.8     | 3.1 |
|          |                               | 6.0                       | -11.8   | 8.5                                  | 8.1     | 7.7               | -9.8    | 5.9                      | -8.7    | 6.8 |

|        |                          |       |      |      |      |     |     |     |       |     |
|--------|--------------------------|-------|------|------|------|-----|-----|-----|-------|-----|
|        | <i>S</i> -(-)-ranolazine | 80.0  | 7.9  | 4.5  | 6.6  | 5.6 | 6.0 | 4.1 | -10.0 | 4.5 |
|        |                          | 160.0 | 6.0  | 5.0  | -1.5 | 0.7 | 5.5 | 1.5 | 6.1   | 2.9 |
|        |                          | 6.0   | 10.4 | 11.7 | 6.4  | 9.8 | 5.3 | 4.8 | 6.0   | 5.3 |
|        | <i>R</i> -(+)-ranolazine | 100.0 | -8.6 | 8.3  | -5.9 | 6.4 | 4.9 | 3.9 | -7.3  | 4.6 |
|        |                          | 200.0 | 3.6  | 5.4  | 3.2  | 2.5 | 1.8 | 0.8 | 3.6   | 3.9 |
| Kidney |                          | 6.0   | 10.9 | 10.1 | 6.0  | 9.9 | 5.1 | 4.4 | 5.6   | 5.1 |
|        | <i>S</i> -(-)-ranolazine | 100.0 | -8.1 | 8.6  | -7.1 | 6.1 | 5.0 | 3.3 | -7.7  | 4.2 |
|        |                          | 200.0 | 3.5  | 5.0  | 3.4  | 2.3 | 2.1 | 0.5 | 3.4   | 4.0 |
